# Supplementary material
Source: publisher figshare collection journal article supplement (https://sage.figshare.com/ndownloader/files/35123518)
Supplement: Supplementary file 1 [file 35123518]

## Supplementary Material

### Table

*Perception of death (Traumatic Y/N) by decedent relationship*

|                  | My child | My parent | My sibling | My spouse | Other | Total |
|------------------|----------|-----------|------------|-----------|-------|-------|
| Traumatic<br>Yes | 86       | 16        | 7          | 2         | 23    | 134   |
| Traumatic<br>No  | 2        | 10        | 1          | 0         | 6     | 19    |
| Total            | 88       | 26        | 8          | 2         | 29    | 153   |

### Recruitment Materials

Ad 1: (for traumatically bereaved)

Researchers from Arizona State University are exploring the experiences of *those aged 18 and older who have experienced traumatic loss and bereavement*. The purpose of this study is to explore extraordinary experiences and sleep disruptions. We are recruiting individuals to participate in a confidential questionnaire, which will take approximately 30-60 minutes. Your participation is voluntary.

Ad 2: (for non-bereaved or general bereaved)

Researchers from Arizona State University are exploring unusual sleep experiences and disruptions. We are recruiting individuals to participate in a confidential questionnaire, which will take approximately 30-60 minutes. Your participation is voluntary.
